# Supplementary material for: Effect of Type 2 Diabetes and Impaired Glucose Tolerance on Digestive Enzymes and Glucose Absorption in the Small Intestine of Young Rats
Source: MDPI journal article supplement (doi:10.3390/nu14020385), 2022-01-17
Supplement: s1 [file s1]

**Table S1.** List of reagents

| Type of analysis                                                                          | Reagents                                                                                                                                                                                                                                                                                                                 |
|-------------------------------------------------------------------------------------------|--------------------------------------------------------------------------------------------------------------------------------------------------------------------------------------------------------------------------------------------------------------------------------------------------------------------------|
| <b><u>Biochemical determination of enzymatic activities:</u></b><br>glucoamylase, maltase | T1503 Trizma base, Sigma; P 8250 Peroxidase, type II, activity 150-200 u/mg, Sigma; M 5885 Maltose, Sigma; G 6125 Glucose oxidase, type II, activity 15-20 ku/g, Sigma; G 8270 Glucose, min 99.5%, Sigma.                                                                                                                |
| alkaline phosphatase                                                                      | 71768 4-Nitrophenyl phosphate disodium salt hexahydrate, Fluka.                                                                                                                                                                                                                                                          |
| aminopeptidase N                                                                          | A 2628 L-alanine -naphthylamide, free base, Sigma.                                                                                                                                                                                                                                                                       |
| <b>Immunohistochemical determination of glucose transporters in the enterocytes</b>       | SC 9117 GLUT2 (H-67) rabbit polyclonal Ig G, Santa Cruz Biotechnology; SC 98974 SGLT1 (H- 85) rabbit polyclonal Ig G, Santa Cruz Biotechnology; ab 97064 DnkpAb to Rb Ig G (HRP), <u>Abcam</u> ; PA1- 74362 Goat anti-rabbit Ig G secondary antibody (HRP conjugate), Thermo scientific Pierce Protein Biology Products. |
| <b>Assessment of glucose absorption in the small intestine</b>                            | G8270 D-Glucose, Sigma-Aldrich.                                                                                                                                                                                                                                                                                          |
| <b>Induction of type 2 diabetes</b>                                                       | S0130 Streptozotocin, Sigma-Aldrich LLC., St. Louis, MO, USA Sigma.                                                                                                                                                                                                                                                      |
| <b>OGTT and ITT tests</b>                                                                 | G8270 D-Glucose, Sigma-Aldrich; Insulin HUMALOG, Lilly France, USA.                                                                                                                                                                                                                                                      |
